# Supplementary material for: Genetic diversity, population structure, and effective population size in two yellow bat species in south Texas
Source: PeerJ. 2020 Nov 18;8:e10348. doi: 10.7717/peerj.10348 (PMC7680031; doi:10.7717/peerj.10348)
Supplement: Supplemental Information 2 [file peerj-08-10348-s002.xlsx]

## Sheet: Shared Loci
Object_ID	Species ID	LAS7468	LAS7468	LAS8830	LAS8830	LAS9151	LAS9151	LAS7831	LAS7831	LcU	LcU	Haplotype	GenBank Accession Number
ID_199	Daeg	362	391	268	272	291	291	411	417	232	236	1	MT510982
ID_317	Daeg	360	370	268	274	291	306	405	407	236	240	1	MT510982
ID_318	Daeg	362	370	272	272	291	300	411	411	236	240	1	MT510982
ID_333	Daeg	358	397	270	276	291	293	405	411	236	244	1	MT510982
ID_372	Daeg	356	412	260	272	287	287	413	419	240	240	1	MT510982
ID_378	Daeg	356	395	268	270	291	291	407	415	232	240	1	MT510982
ID_380	Daeg	360	395	268	276	291	291	409	409	240	244	2	MT510983
ID_385	Daeg	356	412	268	270	262	291	409	409	236	244	1	MT510982
ID_388	Daeg	340	348	272	274	262	291	407	415	220	240	1	MT510982
ID_389	Daeg	354	356	268	272	291	291	411	415	232	236	1	MT510982
ID_196	Daeg	362	391	268	272	291	291	411	417	232	236	1	MT510982
ID_395	Daeg	338	356	272	276	262	262	407	417	240	240	1	MT510982
ID_399	Daeg	368	370	266	272	262	291	409	415	236	253	1	MT510982
ID_400	Daeg	354	360	268	272	291	291	401	409	240	240	1	MT510982
ID_402	Daeg	336	362	274	274	291	291	409	411	236	236	1	MT510982
ID_403	Daeg	342	342	266	270	291	291	409	413	236	244	1	MT510982
ID_404	Daeg	346	368	260	272	262	289	407	413	236	236	1	MT510982
ID_408	Daeg	360	378	274	274	291	298	407	411	232	240	1	MT510982
ID_411	Daeg	346	352	270	272	291	291	407	415	240	244	1	MT510982
ID_412	Daeg	342	395	272	274	287	287	405	411	240	240	1	MT510982
ID_417	Daeg	338	358	270	272	285	291	401	409	236	244	1	MT510982
ID_234	Daeg	354	360	270	276	262	306	407	409	236	244	1	MT510982
ID_418	Daeg	356	399	272	272	291	293	409	417	240	244	1	MT510982
ID_419	Daeg	346	410	262	276	262	291	407	417	232	240	1	MT510982
ID_423	Daeg	328	346	262	268	291	293	415	415	240	240	1	MT510982
ID_424	Daeg	336	362	270	276	262	291	407	411	236	244	1	MT510982
ID_425	Daeg	342	412	270	272	262	287	415	419	232	232	1	MT510982
ID_426	Daeg	330	358	268	272	262	306	413	415	236	240	1	MT510982
ID_427	Daeg	338	358	268	272	291	291	405	407	220	232	1	MT510982
ID_430	Daeg	354	378	266	270	291	291	415	423	232	244	1	MT510982
ID_431	Daeg	346	372	272	272	293	293	407	413	220	232	1	MT510982
ID_434	Daeg	354	391	260	268	291	291	411	415	236	240	1	MT510982
ID_243	Daeg	346	374	272	272	291	291	407	415	232	240	1	MT510982
ID_435	Daeg	365	395	268	270	291	291	413	419	236	244	1	MT510982
ID_436	Daeg	338	386	268	270	291	291	405	415	236	236	1	MT510982
ID_438	Daeg	0	0	260	272	291	291	407	409	232	244	1	MT510982
ID_439	Daeg	380	419	260	272	285	306	409	411	240	240	1	MT510982
ID_078	Daeg	342	374	266	274	291	293	407	413	240	244	1	MT510982
ID_100	Daeg	358	360	260	272	285	291	409	413	232	236	1	MT510982
ID_339	Daeg	338	356	268	272	291	306	407	407	240	244	1	MT510982
ID_311	Daeg	391	395	268	272	291	306	411	417	232	240	1	MT510982
ID_416	Daeg	408	410	268	270	291	291	409	415	240	240	1	MT510982
ID_437	Daeg	346	356	254	268	291	293	407	417	232	240	1	MT510982
ID_301	Daeg	346	370	270	274	291	293	407	409	240	244	1	MT510982
ID_298	Daeg	354	384	272	274	289	306	409	417	236	244	1	MT510982
ID_323	Daeg	368	397	270	272	291	291	407	411	240	244	1	MT510982
ID_324	Daeg	354	399	260	272	291	291	417	419	240	240	1	MT510982
ID_174	Daeg	326	410	270	276	285	291	407	415	240	244	1	MT510982
ID_336	Daeg	354	358	268	270	291	291	409	415	240	244	1	MT510982
ID_338	Daeg	344	346	270	270	293	293	407	415	236	244	0	-
ID_345	Daeg	338	370	266	272	291	293	413	415	240	244	0	-
ID_354	Daeg	311	354	272	274	285	291	407	415	240	240	1	MT510982
ID_360	Daeg	370	374	270	272	285	291	407	409	236	240	0	-
ID_361	Daeg	360	391	268	270	291	291	409	421	236	240	1	MT510982
ID_175	Daeg	356	360	276	280	291	291	407	407	244	248	1	MT510982
ID_369	Daeg	342	354	274	278	285	291	401	409	240	244	1	MT510982
ID_370	Daeg	342	380	270	274	287	291	421	421	240	240	1	MT510982
ID_371	Daeg	362	374	270	274	262	306	409	411	236	240	1	MT510982
ID_375	Daeg	358	386	260	272	291	293	415	415	236	240	1	MT510982
ID_384	Daeg	384	410	268	278	291	293	409	413	232	236	1	MT510982
ID_387	Daeg	342	360	276	276	291	291	407	413	232	232	1	MT510982
ID_393	Daeg	362	410	272	274	291	306	407	415	236	248	1	MT510982
ID_407	Daeg	354	380	274	274	285	291	407	413	236	240	1	MT510982
ID_415	Daeg	346	374	270	276	285	291	407	411	240	244	1	MT510982
ID_432	Daeg	340	362	272	272	291	291	407	415	232	240	1	MT510982
ID_176	Daeg	344	348	272	272	291	291	415	421	240	244	1	MT510982
ID_002	Daeg	354	356	276	284	291	293	407	409	244	244	1	MT510982
ID_007	Daeg	336	358	266	268	298	302	409	413	232	236	0	-
ID_015	Daeg	360	374	260	268	291	291	407	413	232	236	1	MT510982
ID_023	Daeg	0	0	0	0	291	291	0	0	0	0	1	MT510982
ID_032	Daeg	346	362	270	274	293	306	409	409	236	240	1	MT510982
ID_035	Daeg	330	360	270	274	291	291	409	413	232	240	1	MT510982
ID_177	Daeg	346	360	268	276	285	291	409	411	236	244	1	MT510982
ID_045	Daeg	354	358	268	272	262	285	411	417	220	240	1	MT510982
ID_056	Daeg	336	399	270	272	291	291	417	419	240	248	1	MT510982
ID_066	Daeg	362	402	274	274	285	291	409	409	220	236	1	MT510982
ID_069	Daeg	360	419	268	272	285	291	407	407	236	240	1	MT510982
ID_178	Daeg	346	360	270	270	285	291	405	409	236	244	1	MT510982
ID_081	Daeg	342	362	266	272	291	293	409	409	236	236	1	MT510982
ID_089	Daeg	346	346	270	272	262	291	415	415	240	244	1	MT510982
ID_090	Daeg	372	410	270	272	291	291	409	411	236	240	1	MT510982
ID_094	Daeg	356	410	272	272	262	285	409	415	240	248	1	MT510982
ID_101	Daeg	374	408	266	274	285	293	407	409	240	244	1	MT510982
ID_103	Daeg	374	378	262	272	291	291	409	415	240	248	1	MT510982
ID_112	Daeg	352	365	268	270	291	293	409	415	236	240	1	MT510982
ID_113	Daeg	358	389	270	274	291	291	411	415	244	244	1	MT510982
ID_115	Daeg	336	350	268	272	285	291	407	413	236	240	1	MT510982
ID_116	Daeg	354	360	268	272	291	293	413	417	232	236	1	MT510982
ID_126	Daeg	360	382	268	268	291	291	407	417	232	236	1	MT510982
ID_152	Daeg	365	408	274	278	285	291	411	415	236	240	1	MT510982
ID_153	Daeg	354	368	270	272	291	291	409	413	220	240	1	MT510982
ID_155	Daeg	352	360	274	276	291	293	417	417	240	244	1	MT510982
ID_169	Daeg	334	368	272	272	291	291	407	417	236	240	1	MT510982
ID_171	Daeg	354	360	266	270	291	291	407	409	236	240	1	MT510982
ID_218	Daeg	360	376	266	270	291	291	405	407	240	240	1	MT510982
ID_195	Daeg	376	410	270	276	291	293	405	417	244	244	1	MT510982
ID_246	Daeg	346	352	268	270	262	285	407	411	244	244	1	MT510982
ID_262	Daeg	362	397	272	274	285	291	407	411	236	240	0	-
ID_268	Daeg	360	362	262	270	291	291	405	407	240	240	1	MT510982
ID_281	Daeg	354	370	268	270	291	291	407	421	240	248	1	MT510982
ID_288	Daeg	326	360	272	278	291	293	407	415	236	240	1	MT510982
ID_291	Daeg	346	408	268	272	285	291	405	411	244	248	1	MT510982
ID_292	Daeg	344	376	262	268	291	291	415	419	236	244	1	MT510982
ID_312	Daeg	352	356	272	276	291	293	413	415	220	248	1	MT510982
ID_316	Daeg	378	380	260	272	291	291	407	415	244	244	1	MT510982
ID_049	Daeg	397	399	268	272	291	291	407	409	236	244	1	MT510982
ID_193	Daeg	354	360	270	274	291	291	407	409	236	244	1	MT510982
ID_230	Daeg	336	376	270	270	291	291	411	415	240	248	1	MT510982
ID_266	Daeg	338	399	260	272	291	291	407	415	240	244	1	MT510982
ID_274	Daeg	370	382	268	272	291	293	405	409	240	240	1	MT510982
ID_299	Daeg	346	391	268	272	291	293	405	409	236	240	1	MT510982
ID_374	Daeg	348	362	272	272	291	293	407	411	236	240	1	MT510982
ID_420	Daeg	0	0	274	274	274	287	0	0	0	0	1	MT510982
ID_087	Daeg	378	410	270	270	262	291	411	413	232	240	1	MT510982
ID_030	Daeg	410	419	268	272	262	285	409	409	240	244	1	MT510982
ID_210	Daeg	354	410	270	274	291	291	407	409	232	240	0	-
ID_377	Daeg	362	362	274	282	291	291	401	411	236	240	1	MT510982
ID_433	Daeg	336	338	272	272	291	291	413	417	240	244	1	MT510982
ID_139	Dainf	347	373	268	270	274	287	407	407	236	236	1	MT510986
ID_036	Dainf	347	367	266	266	287	287	401	407	236	236	3	MT510987
ID_029	Dainf	347	351	266	266	274	274	401	413	236	253	6	MT510990
ID_037	Dainf	359	369	268	272	274	290	401	407	236	236	3	MT510987
ID_038	Dainf	345	349	266	272	274	287	411	413	228	236	4	MT510988
ID_050	Dainf	359	367	264	264	274	274	407	407	236	236	4	MT510988
ID_051	Dainf	359	369	272	276	274	274	399	407	228	232	7	MT510991
ID_057	Dainf	359	367	266	266	274	274	407	415	228	240	4	MT510988
ID_062	Dainf	325	355	266	270	274	274	399	411	228	236	7	MT510991
ID_082	Dainf	347	365	268	272	274	274	411	415	232	232	4	MT510988
ID_092	Dainf	349	373	266	266	274	274	409	413	236	236	7	MT510991
ID_120	Dainf	355	367	266	272	274	287	399	401	236	244	7	MT510991
ID_122	Dainf	340	347	270	272	272	287	399	415	236	240	4	MT510988
ID_123	Dainf	349	359	266	266	287	287	409	409	236	240	4	MT510988
ID_125	Dainf	347	353	268	270	274	274	409	409	232	240	6	MT510990
ID_127	Dainf	340	353	266	270	274	287	399	399	232	244	4	MT510988
ID_185	Dainf	347	376	266	270	274	274	401	407	232	236	4	MT510988
ID_131	Dainf	345	367	272	272	274	274	401	401	236	236	4	MT510988
ID_132	Dainf	361	376	272	276	274	287	413	415	232	236	4	MT510988
ID_147	Dainf	343	365	268	272	274	287	407	413	228	232	6	MT510990
ID_150	Dainf	367	369	272	274	274	287	399	401	232	236	4	MT510988
ID_158	Dainf	347	353	272	272	274	287	409	409	232	240	4	MT510988
ID_192	Dainf	359	359	266	268	274	287	399	401	236	236	7	MT510991
ID_216	Dainf	343	349	268	272	274	274	409	418	236	236	7	MT510991
ID_003	Dainf	353	357	266	272	274	287	407	415	232	236	4	MT510988
ID_189	Dainf	332	353	266	272	274	287	401	411	232	236	4	MT510988
ID_242	Dainf	347	349	266	272	287	287	407	409	236	236	4	MT510988
ID_190	Dainf	359	373	266	270	274	287	405	411	228	228	4	MT510988
ID_260	Dainf	355	359	268	276	274	287	411	411	232	236	4	MT510988
ID_277	Dainf	355	367	266	272	274	287	409	409	236	236	4	MT510988
ID_286	Dainf	363	371	268	272	274	287	401	409	236	236	7	MT510991
ID_304	Dainf	355	365	266	274	274	287	399	403	232	236	4	MT510988
ID_322	Dainf	345	357	266	272	274	287	405	409	232	236	4	MT510988
ID_334	Dainf	349	355	266	268	274	287	407	409	232	236	7	MT510991
ID_379	Dainf	345	347	270	272	274	287	399	401	232	232	5	MT510989
ID_206	Dainf	355	359	266	270	274	287	399	411	232	236	4	MT510988
ID_441	Dainf	345	353	266	272	287	287	401	407	236	240	4	MT510988
ID_443	Dainf	351	363	266	272	287	287	399	407	232	240	3	MT510987
ID_207	Dainf	0	0	272	272	274	274	401	407	236	236	4	MT510988
ID_232	Dainf	351	353	266	272	274	274	407	407	236	240	4	MT510988
ID_440	Dainf	345	349	262	274	274	274	401	405	232	236	7	MT510991
ID_237	Dainf	340	359	266	272	274	287	399	405	236	236	4	MT510988
ID_249	Dainf	367	371	266	268	274	287	399	405	228	236	7	MT510991
ID_263	Dainf	347	355	272	274	274	287	401	407	236	236	7	MT510991
ID_306	Dainf	355	363	272	272	274	274	405	409	236	240	7	MT510991
ID_342	Dainf	363	376	264	266	274	287	399	405	232	244	4	MT510988
ID_348	Dainf	353	369	266	270	274	274	401	409	232	236	4	MT510988
ID_010	Dainf	355	361	266	266	274	274	405	415	237	244	4	MT510988
ID_414	Dainf	361	373	268	268	287	287	399	409	232	236	4	MT510988
ID_026	Dainf	353	355	266	272	274	274	401	407	240	240	7	MT510991
ID_181	Daini	354	360	266	270	274	274	401	401	232	240	7	MT510998
ID_098	Daini	360	370	270	270	287	287	399	401	232	236	6	MT510997
ID_156	Daini	352	356	266	268	274	274	399	417	236	240	6	MT510997
ID_167	Daini	352	368	274	274	274	287	405	405	232	240	6	MT510997
ID_001	Daini	350	368	272	272	274	274	401	413	224	236	6	MT510997
ID_140	Daini	345	374	264	272	274	287	409	413	232	240	7	MT510998
ID_031	Daini	356	374	270	272	274	287	401	407	232	236	6	MT510997
ID_033	Daini	347	370	266	270	274	287	401	401	236	236	7	MT510998
ID_034	Daini	364	368	266	272	274	287	0	0	236	236	6	MT510997
ID_039	Daini	343	360	266	266	274	274	405	413	236	240	6	MT510997
ID_041	Daini	350	358	272	272	274	287	399	415	232	240	6	MT510997
ID_042	Daini	368	368	266	272	274	287	399	415	236	240	6	MT510997
ID_141	Daini	356	370	264	268	272	287	399	407	240	244	6	MT510997
ID_043	Daini	347	347	268	272	274	287	401	407	236	240	7	MT510998
ID_044	Daini	347	368	266	266	274	287	399	413	236	236	6	MT510997
ID_048	Daini	325	360	264	272	274	274	399	401	228	236	6	MT510997
ID_052	Daini	350	356	268	272	274	274	399	403	232	236	7	MT510998
ID_053	Daini	343	376	264	270	287	290	407	411	240	244	7	MT510998
ID_142	Daini	358	370	266	272	274	274	409	411	240	240	7	MT510998
ID_058	Daini	343	358	264	268	274	274	399	415	240	244	7	MT510998
ID_059	Daini	356	362	266	272	287	287	399	413	236	244	6	MT510997
ID_063	Daini	356	374	266	266	274	287	397	399	232	236	7	MT510998
ID_064	Daini	350	374	266	274	274	287	0	0	240	244	6	MT510997
ID_071	Daini	354	356	270	270	274	274	403	409	236	236	7	MT510998
ID_073	Daini	354	374	266	268	287	287	409	413	228	240	7	MT510998
ID_074	Daini	356	378	266	266	274	287	403	409	228	240	7	MT510998
ID_172	Daini	350	354	266	270	274	287	405	409	240	244	7	MT510998
ID_076	Daini	345	376	264	272	274	274	0	0	0	0	7	MT510998
ID_079	Daini	343	360	270	272	287	287	409	411	232	240	7	MT510998
ID_083	Daini	368	378	266	272	274	274	399	417	228	240	7	MT510998
ID_088	Daini	350	368	264	264	287	287	401	415	228	232	6	MT510997
ID_091	Daini	347	376	266	272	274	287	0	0	232	232	7	MT510998
ID_093	Daini	356	368	272	272	274	287	399	405	232	236	6	MT510997
ID_095	Daini	345	358	264	272	274	274	401	409	228	240	6	MT510997
ID_183	Daini	358	374	266	272	274	274	407	411	228	236	7	MT510998
ID_096	Daini	350	360	270	270	274	287	407	411	236	248	7	MT510998
ID_102	Daini	356	368	266	272	274	274	399	411	232	236	6	MT510997
ID_106	Daini	347	350	264	268	274	274	401	411	232	236	7	MT510998
ID_107	Daini	356	374	270	270	274	287	407	409	232	240	6	MT510997
ID_108	Daini	350	354	266	268	274	287	399	413	236	236	6	MT510997
ID_109	Daini	345	347	266	266	274	287	401	413	236	236	7	MT510998
ID_111	Daini	343	374	272	272	274	287	407	411	232	240	6	MT510997
ID_114	Daini	368	368	264	266	274	287	401	415	228	232	6	MT510997
ID_118	Daini	354	372	266	272	274	287	405	409	236	236	7	MT510998
ID_184	Daini	358	374	266	272	274	274	407	411	228	236	7	MT510998
ID_119	Daini	356	368	266	268	287	287	399	401	236	244	6	MT510997
ID_121	Daini	374	376	266	266	274	274	399	413	228	232	6	MT510997
ID_124	Daini	0	0	270	274	274	287	0	0	236	236	7	MT510998
ID_128	Daini	347	368	264	272	274	287	401	403	232	236	7	MT510998
ID_129	Daini	368	374	272	272	274	274	407	409	236	240	7	MT510998
ID_130	Daini	364	370	264	266	274	287	399	413	232	236	6	MT510997
ID_133	Daini	360	372	272	272	274	287	405	405	228	236	7	MT510998
ID_135	Daini	356	364	266	266	274	287	401	411	232	236	7	MT510998
ID_136	Daini	343	360	266	274	274	287	399	409	236	248	7	MT510998
ID_137	Daini	343	354	266	266	274	287	413	415	228	232	6	MT510997
ID_138	Daini	350	376	272	272	274	287	401	411	240	244	7	MT510998
ID_143	Daini	354	370	266	266	274	287	413	415	232	236	6	MT510997
ID_144	Daini	345	364	272	276	274	287	411	411	232	236	7	MT510998
ID_186	Daini	358	364	272	272	274	287	407	415	228	244	6	MT510997
ID_145	Daini	354	360	272	272	274	287	411	411	232	232	7	MT510998
ID_146	Daini	347	356	264	272	274	274	407	417	232	236	6	MT510997
ID_148	Daini	358	380	266	266	287	287	403	405	240	240	7	MT510998
ID_149	Daini	352	358	266	270	287	287	399	409	236	244	6	MT510997
ID_151	Daini	356	368	264	272	287	287	397	411	236	236	7	MT510998
ID_157	Daini	347	356	272	272	287	287	399	401	236	236	7	MT510998
ID_159	Daini	350	354	272	272	287	287	409	413	240	240	7	MT510998
ID_187	Daini	347	350	266	272	274	287	405	411	232	236	6	MT510997
ID_160	Daini	354	358	266	270	287	287	405	407	236	240	7	MT510998
ID_161	Daini	354	360	270	272	287	287	401	411	232	232	0	-
ID_162	Daini	347	362	266	272	274	274	411	411	228	236	7	MT510998
ID_163	Daini	347	368	266	266	274	287	401	411	232	240	7	MT510998
ID_164	Daini	345	350	266	266	274	274	399	399	232	236	7	MT510998
ID_165	Daini	345	374	266	272	274	287	401	409	236	236	7	MT510998
ID_168	Daini	345	356	264	266	274	287	411	411	228	236	7	MT510998
ID_170	Daini	360	382	264	266	274	274	409	415	240	244	7	MT510998
ID_173	Daini	345	360	272	276	274	287	407	409	236	240	7	MT510998
ID_191	Daini	347	352	272	274	274	274	409	411	236	236	0	-
ID_188	Daini	347	364	268	270	274	274	399	409	236	244	7	MT510998
ID_194	Daini	343	368	266	272	274	287	399	401	236	236	6	MT510997
ID_212	Daini	350	370	266	270	274	287	407	409	228	240	6	MT510997
ID_213	Daini	343	356	270	272	274	287	399	401	232	232	7	MT510998
ID_215	Daini	360	376	266	268	274	274	409	411	236	240	7	MT510998
ID_217	Daini	350	352	272	272	274	287	411	415	236	240	6	MT510997
ID_225	Daini	356	378	266	268	274	274	399	401	232	236	7	MT510998
ID_226	Daini	358	360	266	266	274	287	401	415	232	236	6	MT510997
ID_229	Daini	364	364	266	268	274	274	399	411	236	240	7	MT510998
ID_231	Daini	364	382	264	272	287	287	407	407	232	236	0	-
ID_233	Daini	345	354	266	274	274	274	403	411	236	236	6	MT510997
ID_256	Daini	347	364	264	266	274	274	407	411	240	240	0	-
ID_257	Daini	0	0	266	266	274	287	0	0	236	236	6	MT510997
ID_258	Daini	347	356	266	266	274	287	399	405	236	240	7	MT510998
ID_259	Daini	347	368	268	272	274	287	399	405	232	236	7	MT510998
ID_261	Daini	356	374	266	272	287	287	401	409	232	236	7	MT510998
ID_271	Daini	356	356	274	274	274	274	401	409	232	244	6	MT510997
ID_272	Daini	356	362	266	276	274	287	407	411	236	248	0	-
ID_273	Daini	354	370	272	272	274	274	409	409	236	236	0	-
ID_276	Daini	352	366	264	268	274	287	407	413	236	236	6	MT510997
ID_279	Daini	347	370	268	272	274	287	407	409	236	236	7	MT510998
ID_280	Daini	350	356	272	272	272	272	399	411	228	236	2	MT510993
ID_283	Daini	360	376	266	272	274	274	411	411	232	236	6	MT510997
ID_284	Daini	360	360	266	272	274	287	405	417	236	240	6	MT510997
ID_285	Daini	356	362	268	272	274	274	399	403	236	236	7	MT510998
ID_287	Daini	350	358	266	268	274	287	407	413	236	236	7	MT510998
ID_289	Daini	352	368	268	272	274	274	405	411	232	232	6	MT510997
ID_290	Daini	340	368	264	266	274	287	405	407	236	240	7	MT510998
ID_295	Daini	356	360	266	272	274	287	399	401	232	236	7	MT510998
ID_201	Daini	354	356	266	270	274	274	413	415	228	236	7	MT510998
ID_296	Daini	354	364	270	270	274	274	399	405	236	248	6	MT510997
ID_297	Daini	364	364	266	268	274	287	411	413	232	232	6	MT510997
ID_300	Daini	347	362	266	270	274	274	399	411	236	236	7	MT510998
ID_302	Daini	350	378	272	272	274	287	399	411	236	244	6	MT510997
ID_303	Daini	356	358	266	268	274	274	405	407	232	236	7	MT510998
ID_305	Daini	354	368	266	274	274	274	413	415	232	236	7	MT510998
ID_309	Daini	347	380	266	266	270	274	407	415	236	236	6	MT510997
ID_310	Daini	350	354	264	266	274	287	407	413	236	236	4	MT510995
ID_313	Daini	332	366	266	270	274	274	399	405	232	240	6	MT510997
ID_314	Daini	350	364	266	266	274	287	407	409	236	240	7	MT510998
ID_315	Daini	345	356	266	272	274	287	399	415	236	244	6	MT510997
ID_320	Daini	358	364	272	272	287	287	403	407	232	240	7	MT510998
ID_321	Daini	356	356	266	272	274	287	399	409	228	236	6	MT510997
ID_329	Daini	358	374	264	266	274	287	399	405	232	236	2	MT510993
ID_330	Daini	370	372	264	276	274	287	399	399	232	236	1	MT510992
ID_331	Daini	350	364	268	270	274	274	399	401	236	240	1	MT510992
ID_332	Daini	368	368	272	278	274	287	399	405	240	244	5	MT510996
ID_203	Daini	360	366	272	278	274	274	409	411	236	240	7	MT510998
ID_347	Daini	372	374	266	272	274	274	399	405	240	240	6	MT510997
ID_349	Daini	354	372	266	272	274	274	399	407	232	240	6	MT510997
ID_350	Daini	350	372	266	272	274	274	409	411	232	236	7	MT510998
ID_351	Daini	347	360	264	266	287	287	405	413	240	240	6	MT510997
ID_352	Daini	350	356	266	274	274	287	399	407	240	240	6	MT510997
ID_356	Daini	368	376	268	272	274	274	405	409	236	236	7	MT510998
ID_357	Daini	340	350	266	266	274	274	401	411	232	236	7	MT510998
ID_358	Daini	352	376	272	272	274	287	403	411	236	240	6	MT510997
ID_204	Daini	352	368	268	272	274	274	399	411	228	232	7	MT510998
ID_359	Daini	360	372	266	268	287	287	401	401	236	244	6	MT510997
ID_364	Daini	356	356	266	270	274	274	409	409	228	236	6	MT510997
ID_365	Daini	350	360	266	272	274	287	407	407	232	232	2	MT510993
ID_366	Daini	350	368	266	266	287	287	409	413	228	232	6	MT510997
ID_367	Daini	347	360	266	266	274	287	413	413	236	244	6	MT510997
ID_368	Daini	347	384	270	272	274	287	405	413	236	240	7	MT510998
ID_381	Daini	347	360	268	272	287	287	403	413	236	240	7	MT510998
ID_382	Daini	364	382	268	272	274	274	399	409	240	240	7	MT510998
ID_383	Daini	354	358	266	272	274	287	401	411	240	244	6	MT510997
ID_386	Daini	347	372	266	272	274	274	405	409	240	240	6	MT510997
ID_390	Daini	343	350	266	266	274	287	409	411	232	236	6	MT510997
ID_391	Daini	356	360	268	272	274	287	409	411	232	236	7	MT510998
ID_392	Daini	362	370	266	276	287	287	401	409	236	236	7	MT510998
ID_397	Daini	352	368	268	270	274	274	403	407	232	236	6	MT510997
ID_398	Daini	368	374	268	272	274	274	399	411	236	236	7	MT510998
ID_406	Daini	362	372	272	272	287	287	399	399	236	236	6	MT510997
ID_429	Daini	350	354	270	272	287	287	399	405	232	236	6	MT510997
ID_065	Daini	347	352	266	272	266	274	409	417	236	240	0	-
ID_072	Daini	368	370	266	272	266	274	411	411	240	244	6	MT510997
ID_085	Daini	356	376	264	270	264	270	399	401	232	240	7	MT510998
ID_086	Daini	374	374	266	272	266	274	401	411	236	236	0	-
ID_211	Daini	343	350	270	272	270	274	409	411	228	236	6	MT510997
ID_278	Daini	360	382	266	268	266	268	399	401	232	236	6	MT510997
ID_019	Daini	354	368	266	272	266	272	401	405	236	240	1	MT510992
ID_208	Daini	340	376	266	268	274	274	407	411	236	240	7	MT510998
ID_219	Daini	343	350	264	268	287	287	401	415	232	236	7	MT510998
ID_220	Daini	356	368	266	270	274	274	399	413	232	236	7	MT510998
ID_221	Daini	347	368	266	268	274	287	405	413	236	244	6	MT510997
ID_222	Daini	345	368	272	274	274	287	407	411	232	240	7	MT510998
ID_223	Daini	347	370	264	266	272	287	409	409	232	236	7	MT510998
ID_224	Daini	364	370	264	266	274	287	399	409	232	236	7	MT510998
ID_235	Daini	347	354	264	276	274	287	401	405	236	240	7	MT510998
ID_005	Daini	360	374	266	266	287	287	405	411	232	240	0	-
ID_236	Daini	343	360	266	274	274	287	407	411	232	240	7	MT510998
ID_238	Daini	347	372	266	272	287	287	407	413	232	236	6	MT510997
ID_239	Daini	0	0	266	268	274	274	403	413	236	240	1	MT510992
ID_241	Daini	360	370	266	270	274	274	405	411	228	232	7	MT510998
ID_247	Daini	345	374	264	266	274	287	401	403	236	236	6	MT510997
ID_248	Daini	352	356	266	268	274	287	399	411	236	236	7	MT510998
ID_250	Daini	358	374	270	270	274	287	401	411	228	228	7	MT510998
ID_006	Daini	350	354	266	266	274	274	399	411	232	236	6	MT510997
ID_253	Daini	345	358	266	272	274	287	409	415	236	236	7	MT510998
ID_254	Daini	360	364	270	272	274	293	399	415	240	248	6	MT510997
ID_255	Daini	356	360	266	270	274	274	401	407	236	236	6	MT510997
ID_264	Daini	347	347	0	0	274	274	399	413	236	236	6	MT510997
ID_265	Daini	0	0	268	268	274	274	0	0	232	236	7	MT510998
ID_270	Daini	350	364	270	272	287	287	399	413	240	240	6	MT510997
ID_293	Daini	358	360	268	272	0	0	399	409	236	236	6	MT510997
ID_008	Daini	356	378	266	272	274	274	411	411	232	240	7	MT510998
ID_294	Daini	347	352	266	268	274	287	409	413	236	240	7	MT510998
ID_307	Daini	352	368	266	278	287	287	399	413	228	244	7	MT510998
ID_308	Daini	354	376	266	266	274	274	411	417	236	236	7	MT510998
ID_319	Daini	347	356	266	270	274	287	409	413	240	244	7	MT510998
ID_325	Daini	372	374	268	272	274	287	405	405	236	236	7	MT510998
ID_326	Daini	350	354	264	266	274	274	399	415	232	236	7	MT510998
ID_327	Daini	347	360	266	272	274	274	409	411	232	236	6	MT510997
ID_009	Daini	364	368	268	272	274	287	401	411	236	240	7	MT510998
ID_343	Daini	356	360	264	272	274	274	401	407	236	240	6	MT510997
ID_346	Daini	356	356	266	266	274	287	399	399	236	240	7	MT510998
ID_363	Daini	343	350	266	272	274	274	399	409	236	240	7	MT510998
ID_376	Daini	354	364	274	276	274	274	405	413	236	248	6	MT510997
ID_394	Daini	358	372	264	266	274	287	397	407	236	236	6	MT510997
ID_396	Daini	347	360	266	270	274	274	399	407	236	244	7	MT510998
ID_401	Daini	360	368	264	270	287	287	409	411	232	240	6	MT510997
ID_405	Daini	370	374	266	266	274	274	409	417	232	232	7	MT510998
ID_409	Daini	370	372	272	272	287	287	409	409	236	240	7	MT510998
ID_410	Daini	347	356	272	272	274	274	403	415	232	236	7	MT510998
ID_413	Daini	347	364	268	268	274	287	399	401	228	232	6	MT510997
ID_422	Daini	345	356	264	266	274	287	399	399	236	236	6	MT510997
ID_442	Daini	350	368	272	272	274	287	401	415	232	236	3	MT510994
ID_134	Daini	368	374	266	266	274	274	405	415	236	244	6	MT510997
ID_016	Daini	364	376	268	276	274	274	409	413	236	240	7	MT510998
ID_017	Daini	350	356	272	272	274	287	409	413	236	236	6	MT510997
ID_020	Daini	360	364	270	272	274	293	399	415	236	244	6	MT510997
ID_024	Daini	347	360	268	272	274	287	411	411	232	240	7	MT510998
ID_025	Daini	347	350	266	272	274	287	409	417	236	236	7	MT510998
ID_027	Daini	345	354	264	268	274	287	399	405	240	244	7	MT510998
ID_028	Daini	354	374	270	272	274	287	407	409	224	232	7	MT510998

## Sheet: Daeg
Object_ID	Species ID	Coto_G12	Coto_G12	LAS7468	LAS7468	LAS8830	LAS8830	LAS9555	LAS9555	Cora_F11	Cora_F11	LAS9151	LAS9151	LAS7831	LAS7831	LcM	LcM	LcU	LcU	Haplotype	GenBank Accession Number
ID_199	Daeg	229	231	362	391	268	272	448	460	146	146	291	291	411	417	204	204	232	236	1	MT510982
ID_317	Daeg	223	227	360	370	268	274	448	452	146	146	291	306	405	407	204	228	236	240	1	MT510982
ID_318	Daeg	221	227	362	370	272	272	450	452	146	155	291	300	411	411	208	210	236	240	1	MT510982
ID_333	Daeg	221	225	358	397	270	276	452	485	155	155	291	293	405	411	204	208	236	244	1	MT510982
ID_372	Daeg	213	225	356	412	260	272	441	452	155	155	287	287	413	419	204	206	240	240	1	MT510982
ID_378	Daeg	227	227	356	395	268	270	450	452	146	155	291	291	407	415	204	208	232	240	1	MT510982
ID_380	Daeg	217	225	360	395	268	276	450	454	146	155	291	291	409	409	208	218	240	244	2	MT510983
ID_385	Daeg	223	227	356	412	268	270	454	482	146	146	262	291	409	409	208	214	236	244	1	MT510982
ID_388	Daeg	221	225	340	348	272	274	450	454	146	155	262	291	407	415	204	208	220	240	1	MT510982
ID_389	Daeg	221	223	354	356	268	272	448	450	146	146	291	291	411	415	202	210	232	236	1	MT510982
ID_196	Daeg	229	231	362	391	268	272	448	460	146	146	291	291	411	417	204	204	232	236	1	MT510982
ID_395	Daeg	219	225	338	356	272	276	454	482	146	155	262	262	407	417	208	208	240	240	1	MT510982
ID_399	Daeg	221	227	368	370	266	272	452	472	146	146	262	291	409	415	204	206	236	253	1	MT510982
ID_400	Daeg	221	225	354	360	268	272	450	454	146	155	291	291	401	409	204	208	240	240	1	MT510982
ID_402	Daeg	223	227	336	362	274	274	452	454	146	146	291	291	409	411	204	208	236	236	1	MT510982
ID_403	Daeg	221	221	342	342	266	270	448	474	146	155	291	291	409	413	208	210	236	244	1	MT510982
ID_404	Daeg	221	223	346	368	260	272	448	452	155	155	262	289	407	413	204	206	236	236	1	MT510982
ID_408	Daeg	225	227	360	378	274	274	452	454	146	146	291	298	407	411	208	212	232	240	1	MT510982
ID_411	Daeg	219	227	346	352	270	272	450	450	146	155	291	291	407	415	204	204	240	244	1	MT510982
ID_412	Daeg	225	227	342	395	272	274	454	454	146	146	287	287	405	411	202	218	240	240	1	MT510982
ID_417	Daeg	221	227	338	358	270	272	452	482	146	155	285	291	401	409	202	204	236	244	1	MT510982
ID_234	Daeg	223	223	354	360	270	276	452	452	146	146	262	306	407	409	204	220	236	244	1	MT510982
ID_418	Daeg	217	223	356	399	272	272	450	460	146	155	291	293	409	417	208	208	240	244	1	MT510982
ID_419	Daeg	221	223	346	410	262	276	452	452	146	155	262	291	407	417	204	208	232	240	1	MT510982
ID_423	Daeg	219	225	328	346	262	268	472	480	155	155	291	293	415	415	208	208	240	240	1	MT510982
ID_424	Daeg	225	225	336	362	270	276	452	452	146	155	262	291	407	411	208	208	236	244	1	MT510982
ID_425	Daeg	221	225	342	412	270	272	454	480	155	155	262	287	415	419	204	208	232	232	1	MT510982
ID_426	Daeg	221	225	330	358	268	272	450	452	146	146	262	306	413	415	208	208	236	240	1	MT510982
ID_427	Daeg	219	221	338	358	268	272	454	454	146	146	291	291	405	407	206	230	220	232	1	MT510982
ID_430	Daeg	221	225	354	378	266	270	450	452	146	155	291	291	415	423	202	206	232	244	1	MT510982
ID_431	Daeg	223	227	346	372	272	272	450	454	146	155	293	293	407	413	208	208	220	232	1	MT510982
ID_434	Daeg	219	225	354	391	260	268	450	472	155	155	291	291	411	415	204	208	236	240	1	MT510982
ID_243	Daeg	211	223	346	374	272	272	452	478	155	155	291	291	407	415	208	210	232	240	1	MT510982
ID_435	Daeg	225	227	365	395	268	270	452	482	155	155	291	291	413	419	204	208	236	244	1	MT510982
ID_436	Daeg	221	227	338	386	268	270	454	482	146	155	291	291	405	415	204	208	236	236	1	MT510982
ID_438	Daeg	219	219	0	0	260	272	448	448	155	155	291	291	407	409	208	208	232	244	1	MT510982
ID_439	Daeg	221	221	380	419	260	272	452	482	146	146	285	306	409	411	208	208	240	240	1	MT510982
ID_078	Daeg	211	227	342	374	266	274	454	482	146	155	291	293	407	413	204	208	240	244	1	MT510982
ID_100	Daeg	217	221	358	360	260	272	452	452	146	146	285	291	409	413	208	216	232	236	1	MT510982
ID_339	Daeg	221	223	338	356	268	272	454	460	146	155	291	306	407	407	206	228	240	244	1	MT510982
ID_311	Daeg	221	225	391	395	268	272	454	454	146	155	291	306	411	417	202	208	232	240	1	MT510982
ID_416	Daeg	221	227	408	410	268	270	454	454	146	155	291	291	409	415	206	208	240	240	1	MT510982
ID_437	Daeg	225	227	346	356	254	268	448	450	146	155	291	293	407	417	208	208	232	240	1	MT510982
ID_301	Daeg	211	221	346	370	270	274	450	452	146	155	291	293	407	409	208	208	240	244	1	MT510982
ID_298	Daeg	221	227	354	384	272	274	454	454	146	155	289	306	409	417	208	210	236	244	1	MT510982
ID_323	Daeg	221	221	368	397	270	272	441	485	146	146	291	291	407	411	208	212	240	244	1	MT510982
ID_324	Daeg	221	229	354	399	260	272	454	474	146	155	291	291	417	419	208	208	240	240	1	MT510982
ID_174	Daeg	221	223	326	410	270	276	448	454	155	155	285	291	407	415	204	208	240	244	1	MT510982
ID_336	Daeg	225	225	354	358	268	270	441	452	146	155	291	291	409	415	208	208	240	244	1	MT510982
ID_338	Daeg	219	227	344	346	270	270	448	452	146	155	293	293	407	415	204	208	236	244	0	-
ID_345	Daeg	223	223	338	370	266	272	452	452	146	146	291	293	413	415	224	224	240	244	0	-
ID_354	Daeg	223	227	311	354	272	274	441	454	146	146	285	291	407	415	202	208	240	240	1	MT510982
ID_360	Daeg	225	227	370	374	270	272	450	482	146	155	285	291	407	409	208	216	236	240	0	-
ID_361	Daeg	217	221	360	391	268	270	448	482	146	155	291	291	409	421	204	208	236	240	1	MT510982
ID_175	Daeg	221	229	356	360	276	280	450	452	146	155	291	291	407	407	204	208	244	248	1	MT510982
ID_369	Daeg	223	227	342	354	274	278	454	489	146	155	285	291	401	409	204	224	240	244	1	MT510982
ID_370	Daeg	221	225	342	380	270	274	448	454	146	155	287	291	421	421	204	204	240	240	1	MT510982
ID_371	Daeg	221	227	362	374	270	274	454	485	155	155	262	306	409	411	222	224	236	240	1	MT510982
ID_375	Daeg	221	223	358	386	260	272	454	472	146	155	291	293	415	415	204	208	236	240	1	MT510982
ID_384	Daeg	223	227	384	410	268	278	448	450	155	155	291	293	409	413	202	232	232	236	1	MT510982
ID_387	Daeg	225	227	342	360	276	276	450	454	146	155	291	291	407	413	204	228	232	232	1	MT510982
ID_393	Daeg	221	221	362	410	272	274	452	454	146	155	291	306	407	415	204	208	236	248	1	MT510982
ID_407	Daeg	223	227	354	380	274	274	448	480	155	155	285	291	407	413	204	204	236	240	1	MT510982
ID_415	Daeg	223	223	346	374	270	276	450	450	146	155	285	291	407	411	208	208	240	244	1	MT510982
ID_432	Daeg	225	227	340	362	272	272	452	480	155	155	291	291	407	415	208	208	232	240	1	MT510982
ID_176	Daeg	225	227	344	348	272	272	448	452	146	146	291	291	415	421	204	206	240	244	1	MT510982
ID_002	Daeg	225	229	354	356	276	284	441	450	146	155	291	293	407	409	208	208	244	244	1	MT510982
ID_007	Daeg	221	223	336	358	266	268	470	472	155	155	298	302	409	413	195	200	232	236	0	-
ID_015	Daeg	219	221	360	374	260	268	448	450	146	155	291	291	407	413	208	208	232	236	1	MT510982
ID_023	Daeg	223	225	0	0	0	0	0	0	146	155	291	291	0	0	0	0	0	0	1	MT510982
ID_032	Daeg	221	225	346	362	270	274	452	454	146	146	293	306	409	409	204	208	236	240	1	MT510982
ID_035	Daeg	213	223	330	360	270	274	452	454	146	155	291	291	409	413	224	226	232	240	1	MT510982
ID_177	Daeg	217	225	346	360	268	276	448	452	146	155	285	291	409	411	202	232	236	244	1	MT510982
ID_045	Daeg	221	221	354	358	268	272	450	452	155	155	262	285	411	417	208	216	220	240	1	MT510982
ID_056	Daeg	219	227	336	399	270	272	441	480	146	155	291	291	417	419	204	208	240	248	1	MT510982
ID_066	Daeg	223	225	362	402	274	274	448	454	146	146	285	291	409	409	204	208	220	236	1	MT510982
ID_069	Daeg	221	227	360	419	268	272	450	454	146	155	285	291	407	407	208	208	236	240	1	MT510982
ID_178	Daeg	213	227	346	360	270	270	448	452	146	155	285	291	405	409	208	208	236	244	1	MT510982
ID_081	Daeg	223	227	342	362	266	272	441	450	146	155	291	293	409	409	208	210	236	236	1	MT510982
ID_089	Daeg	221	223	346	346	270	272	450	452	146	155	262	291	415	415	214	224	240	244	1	MT510982
ID_090	Daeg	221	227	372	410	270	272	452	454	146	146	291	291	409	411	204	208	236	240	1	MT510982
ID_094	Daeg	221	223	356	410	272	272	448	452	146	155	262	285	409	415	208	208	240	248	1	MT510982
ID_101	Daeg	221	221	374	408	266	274	441	452	0	0	285	293	407	409	208	208	240	244	1	MT510982
ID_103	Daeg	221	225	374	378	262	272	452	452	146	155	291	291	409	415	204	208	240	248	1	MT510982
ID_112	Daeg	227	227	352	365	268	270	454	454	146	146	291	293	409	415	206	210	236	240	1	MT510982
ID_113	Daeg	219	221	358	389	270	274	448	454	146	155	291	291	411	415	208	208	244	244	1	MT510982
ID_115	Daeg	221	225	336	350	268	272	450	454	146	155	285	291	407	413	236	241	236	240	1	MT510982
ID_116	Daeg	221	223	354	360	268	272	450	450	146	155	291	293	413	417	204	208	232	236	1	MT510982
ID_126	Daeg	221	227	360	382	268	268	450	450	146	155	291	291	407	417	208	210	232	236	1	MT510982
ID_152	Daeg	225	225	365	408	274	278	450	452	155	155	285	291	411	415	236	241	236	240	1	MT510982
ID_153	Daeg	223	225	354	368	270	272	448	452	146	155	291	291	409	413	206	208	220	240	1	MT510982
ID_155	Daeg	221	225	352	360	274	276	448	454	146	155	291	293	417	417	208	208	240	244	1	MT510982
ID_169	Daeg	223	225	334	368	272	272	452	452	146	155	291	291	407	417	204	208	236	240	1	MT510982
ID_171	Daeg	223	225	354	360	266	270	452	452	155	155	291	291	407	409	216	232	236	240	1	MT510982
ID_218	Daeg	223	227	360	376	266	270	448	448	155	155	291	291	405	407	208	208	240	240	1	MT510982
ID_195	Daeg	223	227	376	410	270	276	441	450	146	155	291	293	405	417	208	208	244	244	1	MT510982
ID_246	Daeg	225	225	346	352	268	270	454	454	146	155	262	285	407	411	208	208	244	244	1	MT510982
ID_262	Daeg	223	227	362	397	272	274	448	454	146	146	285	291	407	411	202	208	236	240	0	-
ID_268	Daeg	223	225	360	362	262	270	441	448	155	155	291	291	405	407	204	208	240	240	1	MT510982
ID_281	Daeg	221	223	354	370	268	270	448	454	155	155	291	291	407	421	204	208	240	248	1	MT510982
ID_288	Daeg	219	223	326	360	272	278	448	448	146	146	291	293	407	415	204	208	236	240	1	MT510982
ID_291	Daeg	221	225	346	408	268	272	441	448	146	146	285	291	405	411	204	230	244	248	1	MT510982
ID_292	Daeg	221	225	344	376	262	268	448	487	155	155	291	291	415	419	204	204	236	244	1	MT510982
ID_312	Daeg	221	221	352	356	272	276	454	474	155	155	291	293	413	415	208	224	220	248	1	MT510982
ID_316	Daeg	219	225	378	380	260	272	452	454	155	155	291	291	407	415	208	232	244	244	1	MT510982
ID_049	Daeg	219	225	397	399	268	272	450	480	146	146	291	291	407	409	206	208	236	244	1	MT510982
ID_193	Daeg	213	221	354	360	270	274	448	482	146	146	291	291	407	409	208	208	236	244	1	MT510982
ID_230	Daeg	221	223	336	376	270	270	452	454	146	146	291	291	411	415	204	228	240	248	1	MT510982
ID_266	Daeg	221	221	338	399	260	272	454	480	146	146	291	291	407	415	204	208	240	244	1	MT510982
ID_274	Daeg	223	225	370	382	268	272	450	450	146	155	291	293	405	409	202	208	240	240	1	MT510982
ID_299	Daeg	223	225	346	391	268	272	452	454	146	146	291	293	405	409	208	208	236	240	1	MT510982
ID_374	Daeg	221	221	348	362	272	272	448	460	146	155	291	293	407	411	206	208	236	240	1	MT510982
ID_420	Daeg	223	227	0	0	274	274	0	0	155	155	274	287	0	0	0	0	0	0	1	MT510982
ID_087	Daeg	213	219	378	410	270	270	452	478	146	155	262	291	411	413	204	206	232	240	1	MT510982
ID_030	Daeg	223	225	410	419	268	272	452	454	146	146	262	285	409	409	208	208	240	244	1	MT510982
ID_210	Daeg	225	227	354	410	270	274	448	454	146	155	291	291	407	409	208	208	232	240	0	-
ID_377	Daeg	225	227	362	362	274	282	457	460	146	155	291	291	401	411	208	212	236	240	1	MT510982
ID_433	Daeg	225	227	336	338	272	272	454	454	146	146	291	291	413	417	202	208	240	244	1	MT510982

## Sheet: Dainf
Object_ID	Species ID	Coto_G12	Coto_G12	LAS7468	LAS7468	LAS8830	LAS8830	LAS8425	LAS8425	LAS9151	LAS9151	LAS7831	LAS7831	LcM	LcM	LcU	LcU	Haplotype	GenBank Accession Number
ID_139	Dainf	221	231	347	373	268	270	168	168	274	287	407	407	226	226	236	236	1	MT510986
ID_036	Dainf	225	227	347	367	266	266	168	170	287	287	401	407	222	222	236	236	3	MT510987
ID_029	Dainf	227	227	347	351	266	266	168	168	274	274	401	413	226	228	236	253	6	MT510990
ID_037	Dainf	223	229	359	369	268	272	168	168	274	290	401	407	224	228	236	236	3	MT510987
ID_038	Dainf	221	225	345	349	266	272	168	168	274	287	411	413	222	224	228	236	4	MT510988
ID_050	Dainf	223	227	359	367	264	264	168	172	274	274	407	407	228	236	236	236	4	MT510988
ID_051	Dainf	227	229	359	369	272	276	168	170	274	274	399	407	220	226	228	232	7	MT510991
ID_057	Dainf	225	225	359	367	266	266	168	168	274	274	407	415	226	226	228	240	4	MT510988
ID_062	Dainf	227	229	325	355	266	270	168	168	274	274	399	411	224	226	228	236	7	MT510991
ID_082	Dainf	225	229	347	365	268	272	168	168	274	274	411	415	226	228	232	232	4	MT510988
ID_092	Dainf	219	227	349	373	266	266	168	168	274	274	409	413	224	230	236	236	7	MT510991
ID_120	Dainf	219	227	355	367	266	272	168	168	274	287	399	401	222	226	236	244	7	MT510991
ID_122	Dainf	219	227	340	347	270	272	168	168	272	287	399	415	224	228	236	240	4	MT510988
ID_123	Dainf	217	223	349	359	266	266	168	168	287	287	409	409	224	245	236	240	4	MT510988
ID_125	Dainf	225	227	347	353	268	270	168	168	274	274	409	409	222	226	232	240	6	MT510990
ID_127	Dainf	223	225	340	353	266	270	168	170	274	287	399	399	224	228	232	244	4	MT510988
ID_185	Dainf	223	225	347	376	266	270	168	168	274	274	401	407	224	224	232	236	4	MT510988
ID_131	Dainf	225	231	345	367	272	272	168	172	274	274	401	401	224	232	236	236	4	MT510988
ID_132	Dainf	225	231	361	376	272	276	168	168	274	287	413	415	220	224	232	236	4	MT510988
ID_147	Dainf	221	225	343	365	268	272	168	168	274	287	407	413	228	228	228	232	6	MT510990
ID_150	Dainf	223	227	367	369	272	274	166	168	274	287	399	401	224	224	232	236	4	MT510988
ID_158	Dainf	227	227	347	353	272	272	168	170	274	287	409	409	222	224	232	240	4	MT510988
ID_192	Dainf	221	229	359	359	266	268	168	168	274	287	399	401	224	230	236	236	7	MT510991
ID_216	Dainf	225	229	343	349	268	272	168	168	274	274	409	418	222	232	236	236	7	MT510991
ID_003	Dainf	229	229	353	357	266	272	168	168	274	287	407	415	224	226	232	236	4	MT510988
ID_189	Dainf	225	227	332	353	266	272	168	170	274	287	401	411	226	236	232	236	4	MT510988
ID_242	Dainf	217	227	347	349	266	272	168	170	287	287	407	409	203	224	236	236	4	MT510988
ID_190	Dainf	225	229	359	373	266	270	168	168	274	287	405	411	224	228	228	228	4	MT510988
ID_260	Dainf	215	225	355	359	268	276	168	168	274	287	411	411	220	232	232	236	4	MT510988
ID_277	Dainf	211	227	355	367	266	272	168	168	274	287	409	409	224	232	236	236	4	MT510988
ID_286	Dainf	225	231	363	371	268	272	168	170	274	287	401	409	224	228	236	236	7	MT510991
ID_304	Dainf	225	227	355	365	266	274	168	168	274	287	399	403	224	224	232	236	4	MT510988
ID_322	Dainf	219	225	345	357	266	272	168	168	274	287	405	409	222	224	232	236	4	MT510988
ID_334	Dainf	223	229	349	355	266	268	168	168	274	287	407	409	214	228	232	236	7	MT510991
ID_379	Dainf	219	229	345	347	270	272	168	168	274	287	399	401	224	230	232	232	5	MT510989
ID_206	Dainf	225	225	355	359	266	270	168	168	274	287	399	411	226	230	232	236	4	MT510988
ID_441	Dainf	211	217	345	353	266	272	168	168	287	287	401	407	222	226	236	240	4	MT510988
ID_443	Dainf	227	231	351	363	266	272	166	168	287	287	399	407	226	241	232	240	3	MT510987
ID_207	Dainf	225	225	0	0	272	272	168	168	274	274	401	407	224	230	236	236	4	MT510988
ID_232	Dainf	219	229	351	353	266	272	168	168	274	274	407	407	210	245	236	240	4	MT510988
ID_440	Dainf	217	225	345	349	262	274	168	168	274	274	401	405	224	224	232	236	7	MT510991
ID_237	Dainf	227	227	340	359	266	272	166	168	274	287	399	405	224	228	236	236	4	MT510988
ID_249	Dainf	229	229	367	371	266	268	168	168	274	287	399	405	224	224	228	236	7	MT510991
ID_263	Dainf	221	229	347	355	272	274	168	172	274	287	401	407	222	232	236	236	7	MT510991
ID_306	Dainf	227	231	355	363	272	272	168	168	274	274	405	409	224	224	236	240	7	MT510991
ID_342	Dainf	229	229	363	376	264	266	168	170	274	287	399	405	230	230	232	244	4	MT510988
ID_348	Dainf	229	229	353	369	266	270	168	168	274	274	401	409	228	228	232	236	4	MT510988
ID_010	Dainf	219	223	355	361	266	266	168	168	274	274	405	415	224	228	237	244	4	MT510988
ID_414	Dainf	219	221	361	373	268	268	168	168	287	287	399	409	224	226	232	236	4	MT510988
ID_026	Dainf	227	231	353	355	266	272	168	172	274	274	401	407	224	224	240	240	7	MT510991

## Sheet: Daini
Object_ID	Species ID	LAS7468	LAS7468	LAS8830	LAS8830	LAS2547	LAS2547	LAS8425	LAS8425	LAS9151	LAS9151	LAS7831	LAS7831	LcU	LcU	Haplotype	GenBank Accession Number
ID_181	Daini	354	360	266	270	450	452	168	168	274	274	401	401	232	240	7	MT510998
ID_098	Daini	360	370	270	270	446	456	168	168	287	287	399	401	232	236	6	MT510997
ID_156	Daini	352	356	266	268	448	454	168	168	274	274	399	417	236	240	6	MT510997
ID_167	Daini	352	368	274	274	440	440	168	168	274	287	405	405	232	240	6	MT510997
ID_001	Daini	350	368	272	272	446	450	168	168	274	274	401	413	224	236	6	MT510997
ID_140	Daini	345	374	264	272	438	454	168	168	274	287	409	413	232	240	7	MT510998
ID_031	Daini	356	374	270	272	448	454	168	168	274	287	401	407	232	236	6	MT510997
ID_033	Daini	347	370	266	270	446	452	168	168	274	287	401	401	236	236	7	MT510998
ID_034	Daini	364	368	266	272	0	0	168	168	274	287	0	0	236	236	6	MT510997
ID_039	Daini	343	360	266	266	450	450	168	168	274	274	405	413	236	240	6	MT510997
ID_041	Daini	350	358	272	272	446	450	168	168	274	287	399	415	232	240	6	MT510997
ID_042	Daini	368	368	266	272	450	450	168	168	274	287	399	415	236	240	6	MT510997
ID_141	Daini	356	370	264	268	444	450	168	168	272	287	399	407	240	244	6	MT510997
ID_043	Daini	347	347	268	272	450	452	168	168	274	287	401	407	236	240	7	MT510998
ID_044	Daini	347	368	266	266	450	450	168	172	274	287	399	413	236	236	6	MT510997
ID_048	Daini	325	360	264	272	448	448	168	168	274	274	399	401	228	236	6	MT510997
ID_052	Daini	350	356	268	272	440	450	168	168	274	274	399	403	232	236	7	MT510998
ID_053	Daini	343	376	264	270	448	450	168	168	287	290	407	411	240	244	7	MT510998
ID_142	Daini	358	370	266	272	0	0	168	168	274	274	409	411	240	240	7	MT510998
ID_058	Daini	343	358	264	268	446	456	168	168	274	274	399	415	240	244	7	MT510998
ID_059	Daini	356	362	266	272	448	458	168	168	287	287	399	413	236	244	6	MT510997
ID_063	Daini	356	374	266	266	450	458	168	168	274	287	397	399	232	236	7	MT510998
ID_064	Daini	350	374	266	274	0	0	168	170	274	287	0	0	240	244	6	MT510997
ID_071	Daini	354	356	270	270	452	452	168	170	274	274	403	409	236	236	7	MT510998
ID_073	Daini	354	374	266	268	440	450	168	168	287	287	409	413	228	240	7	MT510998
ID_074	Daini	356	378	266	266	450	452	168	170	274	287	403	409	228	240	7	MT510998
ID_172	Daini	350	354	266	270	450	450	168	168	274	287	405	409	240	244	7	MT510998
ID_076	Daini	345	376	264	272	0	0	168	168	274	274	0	0	0	0	7	MT510998
ID_079	Daini	343	360	270	272	448	450	168	168	287	287	409	411	232	240	7	MT510998
ID_083	Daini	368	378	266	272	450	450	168	168	274	274	399	417	228	240	7	MT510998
ID_088	Daini	350	368	264	264	448	448	168	168	287	287	401	415	228	232	6	MT510997
ID_091	Daini	347	376	266	272	446	448	168	172	274	287	0	0	232	232	7	MT510998
ID_093	Daini	356	368	272	272	450	452	168	168	274	287	399	405	232	236	6	MT510997
ID_095	Daini	345	358	264	272	433	446	168	168	274	274	401	409	228	240	6	MT510997
ID_183	Daini	358	374	266	272	446	450	168	168	274	274	407	411	228	236	7	MT510998
ID_096	Daini	350	360	270	270	448	456	168	168	274	287	407	411	236	248	7	MT510998
ID_102	Daini	356	368	266	272	448	450	168	170	274	274	399	411	232	236	6	MT510997
ID_106	Daini	347	350	264	268	450	452	168	168	274	274	401	411	232	236	7	MT510998
ID_107	Daini	356	374	270	270	448	450	168	168	274	287	407	409	232	240	6	MT510997
ID_108	Daini	350	354	266	268	450	450	168	168	274	287	399	413	236	236	6	MT510997
ID_109	Daini	345	347	266	266	450	452	168	168	274	287	401	413	236	236	7	MT510998
ID_111	Daini	343	374	272	272	442	454	168	168	274	287	407	411	232	240	6	MT510997
ID_114	Daini	368	368	264	266	448	454	168	168	274	287	401	415	228	232	6	MT510997
ID_118	Daini	354	372	266	272	450	458	168	168	274	287	405	409	236	236	7	MT510998
ID_184	Daini	358	374	266	272	446	450	168	168	274	274	407	411	228	236	7	MT510998
ID_119	Daini	356	368	266	268	450	452	168	168	287	287	399	401	236	244	6	MT510997
ID_121	Daini	374	376	266	266	0	0	168	168	274	274	399	413	228	232	6	MT510997
ID_124	Daini	0	0	270	274	0	0	168	168	274	287	0	0	236	236	7	MT510998
ID_128	Daini	347	368	264	272	446	448	168	168	274	287	401	403	232	236	7	MT510998
ID_129	Daini	368	374	272	272	450	450	168	168	274	274	407	409	236	240	7	MT510998
ID_130	Daini	364	370	264	266	446	454	168	168	274	287	399	413	232	236	6	MT510997
ID_133	Daini	360	372	272	272	440	450	168	168	274	287	405	405	228	236	7	MT510998
ID_135	Daini	356	364	266	266	448	454	168	168	274	287	401	411	232	236	7	MT510998
ID_136	Daini	343	360	266	274	450	452	168	168	274	287	399	409	236	248	7	MT510998
ID_137	Daini	343	354	266	266	450	452	168	168	274	287	413	415	228	232	6	MT510997
ID_138	Daini	350	376	272	272	440	446	168	168	274	287	401	411	240	244	7	MT510998
ID_143	Daini	354	370	266	266	450	458	168	168	274	287	413	415	232	236	6	MT510997
ID_144	Daini	345	364	272	276	448	461	168	168	274	287	411	411	232	236	7	MT510998
ID_186	Daini	358	364	272	272	446	448	168	170	274	287	407	415	228	244	6	MT510997
ID_145	Daini	354	360	272	272	448	448	168	168	274	287	411	411	232	232	7	MT510998
ID_146	Daini	347	356	264	272	450	450	168	170	274	274	407	417	232	236	6	MT510997
ID_148	Daini	358	380	266	266	450	450	168	170	287	287	403	405	240	240	7	MT510998
ID_149	Daini	352	358	266	270	448	450	168	170	287	287	399	409	236	244	6	MT510997
ID_151	Daini	356	368	264	272	446	450	168	168	287	287	397	411	236	236	7	MT510998
ID_157	Daini	347	356	272	272	433	450	168	168	287	287	399	401	236	236	7	MT510998
ID_159	Daini	350	354	272	272	444	448	168	168	287	287	409	413	240	240	7	MT510998
ID_187	Daini	347	350	266	272	448	448	168	168	274	287	405	411	232	236	6	MT510997
ID_160	Daini	354	358	266	270	438	450	168	170	287	287	405	407	236	240	7	MT510998
ID_161	Daini	354	360	270	272	440	452	168	168	287	287	401	411	232	232	0	-
ID_162	Daini	347	362	266	272	446	450	168	168	274	274	411	411	228	236	7	MT510998
ID_163	Daini	347	368	266	266	452	454	168	168	274	287	401	411	232	240	7	MT510998
ID_164	Daini	345	350	266	266	450	454	168	168	274	274	399	399	232	236	7	MT510998
ID_165	Daini	345	374	266	272	450	452	168	168	274	287	401	409	236	236	7	MT510998
ID_168	Daini	345	356	264	266	452	454	168	168	274	287	411	411	228	236	7	MT510998
ID_170	Daini	360	382	264	266	446	452	168	168	274	274	409	415	240	244	7	MT510998
ID_173	Daini	345	360	272	276	0	0	168	168	274	287	407	409	236	240	7	MT510998
ID_191	Daini	347	352	272	274	450	450	166	168	274	274	409	411	236	236	0	-
ID_188	Daini	347	364	268	270	450	450	168	168	274	274	399	409	236	244	7	MT510998
ID_194	Daini	343	368	266	272	446	448	168	170	274	287	399	401	236	236	6	MT510997
ID_212	Daini	350	370	266	270	444	448	168	168	274	287	407	409	228	240	6	MT510997
ID_213	Daini	343	356	270	272	0	0	168	168	274	287	399	401	232	232	7	MT510998
ID_215	Daini	360	376	266	268	0	0	168	168	274	274	409	411	236	240	7	MT510998
ID_217	Daini	350	352	272	272	446	450	168	168	274	287	411	415	236	240	6	MT510997
ID_225	Daini	356	378	266	268	450	452	168	168	274	274	399	401	232	236	7	MT510998
ID_226	Daini	358	360	266	266	446	448	168	168	274	287	401	415	232	236	6	MT510997
ID_229	Daini	364	364	266	268	444	454	168	172	274	274	399	411	236	240	7	MT510998
ID_231	Daini	364	382	264	272	444	452	168	168	287	287	407	407	232	236	0	-
ID_233	Daini	345	354	266	274	446	450	168	172	274	274	403	411	236	236	6	MT510997
ID_256	Daini	347	364	264	266	446	448	168	168	274	274	407	411	240	240	0	-
ID_257	Daini	0	0	266	266	0	0	168	168	274	287	0	0	236	236	6	MT510997
ID_258	Daini	347	356	266	266	440	450	168	168	274	287	399	405	236	240	7	MT510998
ID_259	Daini	347	368	268	272	442	450	168	168	274	287	399	405	232	236	7	MT510998
ID_261	Daini	356	374	266	272	454	456	168	168	287	287	401	409	232	236	7	MT510998
ID_271	Daini	356	356	274	274	450	456	168	168	274	274	401	409	232	244	6	MT510997
ID_272	Daini	356	362	266	276	456	458	168	168	274	287	407	411	236	248	0	-
ID_273	Daini	354	370	272	272	444	452	168	168	274	274	409	409	236	236	0	-
ID_276	Daini	352	366	264	268	450	450	168	172	274	287	407	413	236	236	6	MT510997
ID_279	Daini	347	370	268	272	444	448	168	168	274	287	407	409	236	236	7	MT510998
ID_280	Daini	350	356	272	272	450	454	168	168	272	272	399	411	228	236	2	MT510993
ID_283	Daini	360	376	266	272	446	454	168	168	274	274	411	411	232	236	6	MT510997
ID_284	Daini	360	360	266	272	446	448	168	168	274	287	405	417	236	240	6	MT510997
ID_285	Daini	356	362	268	272	444	450	168	168	274	274	399	403	236	236	7	MT510998
ID_287	Daini	350	358	266	268	446	450	168	168	274	287	407	413	236	236	7	MT510998
ID_289	Daini	352	368	268	272	448	450	168	168	274	274	405	411	232	232	6	MT510997
ID_290	Daini	340	368	264	266	438	452	168	170	274	287	405	407	236	240	7	MT510998
ID_295	Daini	356	360	266	272	446	450	168	168	274	287	399	401	232	236	7	MT510998
ID_201	Daini	354	356	266	270	448	450	168	168	274	274	413	415	228	236	7	MT510998
ID_296	Daini	354	364	270	270	450	450	166	168	274	274	399	405	236	248	6	MT510997
ID_297	Daini	364	364	266	268	448	450	168	168	274	287	411	413	232	232	6	MT510997
ID_300	Daini	347	362	266	270	448	450	168	168	274	274	399	411	236	236	7	MT510998
ID_302	Daini	350	378	272	272	446	452	168	168	274	287	399	411	236	244	6	MT510997
ID_303	Daini	356	358	266	268	438	448	168	168	274	274	405	407	232	236	7	MT510998
ID_305	Daini	354	368	266	274	444	450	168	168	274	274	413	415	232	236	7	MT510998
ID_309	Daini	347	380	266	266	448	450	168	168	270	274	407	415	236	236	6	MT510997
ID_310	Daini	350	354	264	266	450	454	168	168	274	287	407	413	236	236	4	MT510995
ID_313	Daini	332	366	266	270	450	450	166	168	274	274	399	405	232	240	6	MT510997
ID_314	Daini	350	364	266	266	448	454	168	168	274	287	407	409	236	240	7	MT510998
ID_315	Daini	345	356	266	272	440	448	168	168	274	287	399	415	236	244	6	MT510997
ID_320	Daini	358	364	272	272	448	450	168	168	287	287	403	407	232	240	7	MT510998
ID_321	Daini	356	356	266	272	452	456	168	168	274	287	399	409	228	236	6	MT510997
ID_329	Daini	358	374	264	266	448	450	168	168	274	287	399	405	232	236	2	MT510993
ID_330	Daini	370	372	264	276	450	450	168	168	274	287	399	399	232	236	1	MT510992
ID_331	Daini	350	364	268	270	438	448	168	168	274	274	399	401	236	240	1	MT510992
ID_332	Daini	368	368	272	278	428	444	166	168	274	287	399	405	240	244	5	MT510996
ID_203	Daini	360	366	272	278	436	446	166	168	274	274	409	411	236	240	7	MT510998
ID_347	Daini	372	374	266	272	446	456	168	168	274	274	399	405	240	240	6	MT510997
ID_349	Daini	354	372	266	272	446	450	168	168	274	274	399	407	232	240	6	MT510997
ID_350	Daini	350	372	266	272	440	456	168	168	274	274	409	411	232	236	7	MT510998
ID_351	Daini	347	360	264	266	446	452	168	168	287	287	405	413	240	240	6	MT510997
ID_352	Daini	350	356	266	274	450	450	168	168	274	287	399	407	240	240	6	MT510997
ID_356	Daini	368	376	268	272	448	450	168	168	274	274	405	409	236	236	7	MT510998
ID_357	Daini	340	350	266	266	450	456	168	168	274	274	401	411	232	236	7	MT510998
ID_358	Daini	352	376	272	272	450	450	168	168	274	287	403	411	236	240	6	MT510997
ID_204	Daini	352	368	268	272	0	0	168	170	274	274	399	411	228	232	7	MT510998
ID_359	Daini	360	372	266	268	448	450	168	168	287	287	401	401	236	244	6	MT510997
ID_364	Daini	356	356	266	270	450	456	168	168	274	274	409	409	228	236	6	MT510997
ID_365	Daini	350	360	266	272	442	448	168	168	274	287	407	407	232	232	2	MT510993
ID_366	Daini	350	368	266	266	433	450	168	168	287	287	409	413	228	232	6	MT510997
ID_367	Daini	347	360	266	266	446	448	168	168	274	287	413	413	236	244	6	MT510997
ID_368	Daini	347	384	270	272	446	452	168	168	274	287	405	413	236	240	7	MT510998
ID_381	Daini	347	360	268	272	450	450	168	168	287	287	403	413	236	240	7	MT510998
ID_382	Daini	364	382	268	272	433	450	168	168	274	274	399	409	240	240	7	MT510998
ID_383	Daini	354	358	266	272	450	454	168	168	274	287	401	411	240	244	6	MT510997
ID_386	Daini	347	372	266	272	448	452	168	170	274	274	405	409	240	240	6	MT510997
ID_390	Daini	343	350	266	266	446	452	168	168	274	287	409	411	232	236	6	MT510997
ID_391	Daini	356	360	268	272	448	450	168	168	274	287	409	411	232	236	7	MT510998
ID_392	Daini	362	370	266	276	450	452	168	170	287	287	401	409	236	236	7	MT510998
ID_397	Daini	352	368	268	270	452	454	168	168	274	274	403	407	232	236	6	MT510997
ID_398	Daini	368	374	268	272	456	456	168	172	274	274	399	411	236	236	7	MT510998
ID_406	Daini	362	372	272	272	428	454	168	172	287	287	399	399	236	236	6	MT510997
ID_429	Daini	350	354	270	272	450	456	168	168	287	287	399	405	232	236	6	MT510997
ID_065	Daini	347	352	266	272	0	0	168	168	266	274	409	417	236	240	0	-
ID_072	Daini	368	370	266	272	0	0	168	172	266	274	411	411	240	244	6	MT510997
ID_085	Daini	356	376	264	270	0	0	168	168	264	270	399	401	232	240	7	MT510998
ID_086	Daini	374	374	266	272	0	0	168	168	266	274	401	411	236	236	0	-
ID_211	Daini	343	350	270	272	0	0	170	170	270	274	409	411	228	236	6	MT510997
ID_278	Daini	360	382	266	268	0	0	168	168	266	268	399	401	232	236	6	MT510997
ID_019	Daini	354	368	266	272	0	0	168	172	266	272	401	405	236	240	1	MT510992
ID_208	Daini	340	376	266	268	0	0	168	170	274	274	407	411	236	240	7	MT510998
ID_219	Daini	343	350	264	268	446	448	168	168	287	287	401	415	232	236	7	MT510998
ID_220	Daini	356	368	266	270	0	0	168	168	274	274	399	413	232	236	7	MT510998
ID_221	Daini	347	368	266	268	442	456	168	168	274	287	405	413	236	244	6	MT510997
ID_222	Daini	345	368	272	274	450	450	168	168	274	287	407	411	232	240	7	MT510998
ID_223	Daini	347	370	264	266	448	452	168	168	272	287	409	409	232	236	7	MT510998
ID_224	Daini	364	370	264	266	0	0	168	168	274	287	399	409	232	236	7	MT510998
ID_235	Daini	347	354	264	276	440	450	168	168	274	287	401	405	236	240	7	MT510998
ID_005	Daini	360	374	266	266	448	461	168	168	287	287	405	411	232	240	0	-
ID_236	Daini	343	360	266	274	452	456	168	168	274	287	407	411	232	240	7	MT510998
ID_238	Daini	347	372	266	272	450	452	168	172	287	287	407	413	232	236	6	MT510997
ID_239	Daini	0	0	266	268	0	0	168	168	274	274	403	413	236	240	1	MT510992
ID_241	Daini	360	370	266	270	448	450	168	168	274	274	405	411	228	232	7	MT510998
ID_247	Daini	345	374	264	266	450	456	168	168	274	287	401	403	236	236	6	MT510997
ID_248	Daini	352	356	266	268	448	454	168	168	274	287	399	411	236	236	7	MT510998
ID_250	Daini	358	374	270	270	446	452	168	172	274	287	401	411	228	228	7	MT510998
ID_006	Daini	350	354	266	266	450	456	168	172	274	274	399	411	232	236	6	MT510997
ID_253	Daini	345	358	266	272	438	442	166	168	274	287	409	415	236	236	7	MT510998
ID_254	Daini	360	364	270	272	444	450	168	188	274	293	399	415	240	248	6	MT510997
ID_255	Daini	356	360	266	270	446	448	168	170	274	274	401	407	236	236	6	MT510997
ID_264	Daini	347	347	0	0	0	0	168	168	274	274	399	413	236	236	6	MT510997
ID_265	Daini	0	0	268	268	0	0	168	168	274	274	0	0	232	236	7	MT510998
ID_270	Daini	350	364	270	272	450	450	166	168	287	287	399	413	240	240	6	MT510997
ID_293	Daini	358	360	268	272	0	0	0	0	0	0	399	409	236	236	6	MT510997
ID_008	Daini	356	378	266	272	438	448	168	168	274	274	411	411	232	240	7	MT510998
ID_294	Daini	347	352	266	268	444	450	168	168	274	287	409	413	236	240	7	MT510998
ID_307	Daini	352	368	266	278	450	454	166	168	287	287	399	413	228	244	7	MT510998
ID_308	Daini	354	376	266	266	440	448	168	168	274	274	411	417	236	236	7	MT510998
ID_319	Daini	347	356	266	270	442	450	168	170	274	287	409	413	240	244	7	MT510998
ID_325	Daini	372	374	268	272	448	450	168	172	274	287	405	405	236	236	7	MT510998
ID_326	Daini	350	354	264	266	0	0	166	168	274	274	399	415	232	236	7	MT510998
ID_327	Daini	347	360	266	272	444	450	168	168	274	274	409	411	232	236	6	MT510997
ID_009	Daini	364	368	268	272	444	446	168	168	274	287	401	411	236	240	7	MT510998
ID_343	Daini	356	360	264	272	448	448	168	168	274	274	401	407	236	240	6	MT510997
ID_346	Daini	356	356	266	266	444	454	168	170	274	287	399	399	236	240	7	MT510998
ID_363	Daini	343	350	266	272	440	456	168	170	274	274	399	409	236	240	7	MT510998
ID_376	Daini	354	364	274	276	444	448	168	168	274	274	405	413	236	248	6	MT510997
ID_394	Daini	358	372	264	266	0	0	168	168	274	287	397	407	236	236	6	MT510997
ID_396	Daini	347	360	266	270	0	0	168	168	274	274	399	407	236	244	7	MT510998
ID_401	Daini	360	368	264	270	446	450	168	168	287	287	409	411	232	240	6	MT510997
ID_405	Daini	370	374	266	266	448	450	168	168	274	274	409	417	232	232	7	MT510998
ID_409	Daini	370	372	272	272	436	450	168	168	287	287	409	409	236	240	7	MT510998
ID_410	Daini	347	356	272	272	450	454	168	168	274	274	403	415	232	236	7	MT510998
ID_413	Daini	347	364	268	268	442	448	168	168	274	287	399	401	228	232	6	MT510997
ID_422	Daini	345	356	264	266	440	444	168	168	274	287	399	399	236	236	6	MT510997
ID_442	Daini	350	368	272	272	458	458	168	168	274	287	401	415	232	236	3	MT510994
ID_134	Daini	368	374	266	266	446	448	168	168	274	274	405	415	236	244	6	MT510997
ID_016	Daini	364	376	268	276	450	452	168	168	274	274	409	413	236	240	7	MT510998
ID_017	Daini	350	356	272	272	446	448	168	168	274	287	409	413	236	236	6	MT510997
ID_020	Daini	360	364	270	272	444	450	168	188	274	293	399	415	236	244	6	MT510997
ID_024	Daini	347	360	268	272	448	450	168	170	274	287	411	411	232	240	7	MT510998
ID_025	Daini	347	350	266	272	448	452	168	168	274	287	409	417	236	236	7	MT510998
ID_027	Daini	345	354	264	268	448	450	168	168	274	287	399	405	240	244	7	MT510998
ID_028	Daini	354	374	270	272	444	450	168	168	274	287	407	409	224	232	7	MT510998
